# Supplementary material for: Antisense oligonucleotide-mediated correction of CFTR splicing improves chloride secretion in cystic fibrosis patient-derived bronchial epithelial cells
Source: PubMed Central journal article supplement (PMC7367209; doi:10.1093/nar/gkaa490), 2020-06-10
Supplement: gkaa490_supplemental_file.pdf [file gkaa490_supplemental_file.pdf]

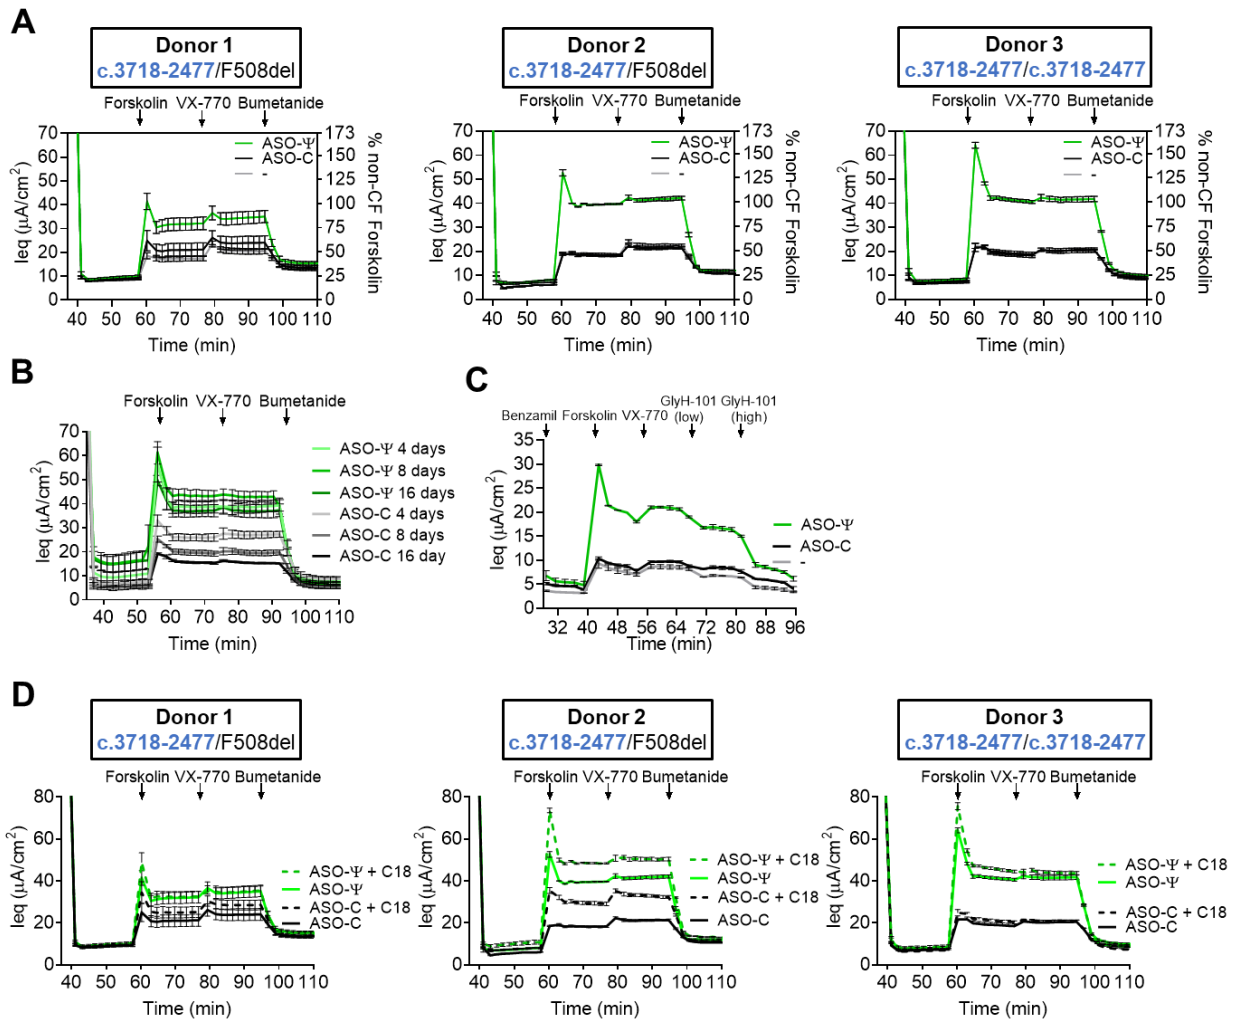

**Supplementary Figure S1.** Current traces with error bars. **(A)** Current traces from Figure 2 with error bars. ( $\pm$ SEM; N=9 (donor 1), N=3 (donor 2), N=4 (donor 3)). **(B)** Current traces from Figure 4 with error bars. ( $\pm$ SEM; N=3). **(C)** Current trace from Figure 5 with error bars. ( $\pm$ SEM, N=2). **(D)** Current traces from Figure 6 with error bars. ( $\pm$ SEM; N=9 (donor 1), N=3 (donor 2), N=4 (donor 3)).

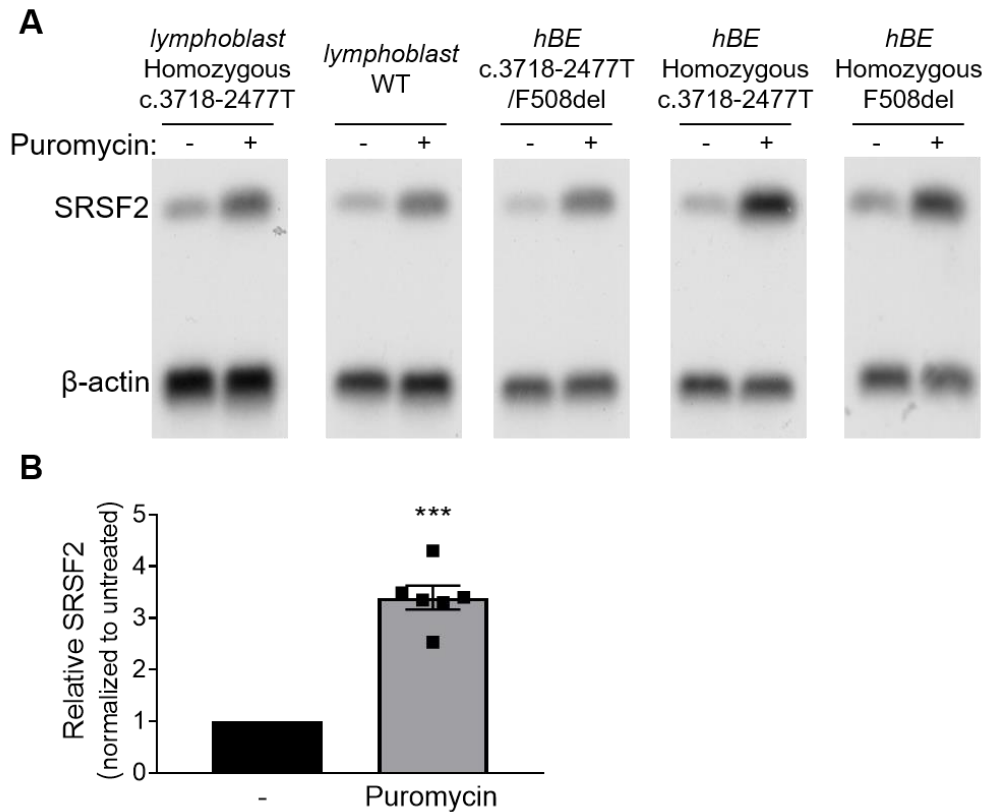

**Supplementary Figure S2.** Puromycin treatment of lymphoblasts inhibits nonsense-mediated mRNA decay of SRSF2 mRNA isoform with premature termination codon. **(A)** An RT-PCR analysis of SRSF2, a known substrate of NMD, expression in CFTR expressing cell models used in the study treated (+) or untreated (-) with puromycin (200 $\mu$ g/ul) for 9 hours (lymphoblasts) or 6 hours (hBEs).  $\beta$ -actin was used as a control for RNA expression. **(B)** SRSF2 expression after puromycin treatment was quantified and normalized to the untreated samples ( $\pm$ SEM; N=5; one sample t-test, \*\*\*p<0.001).

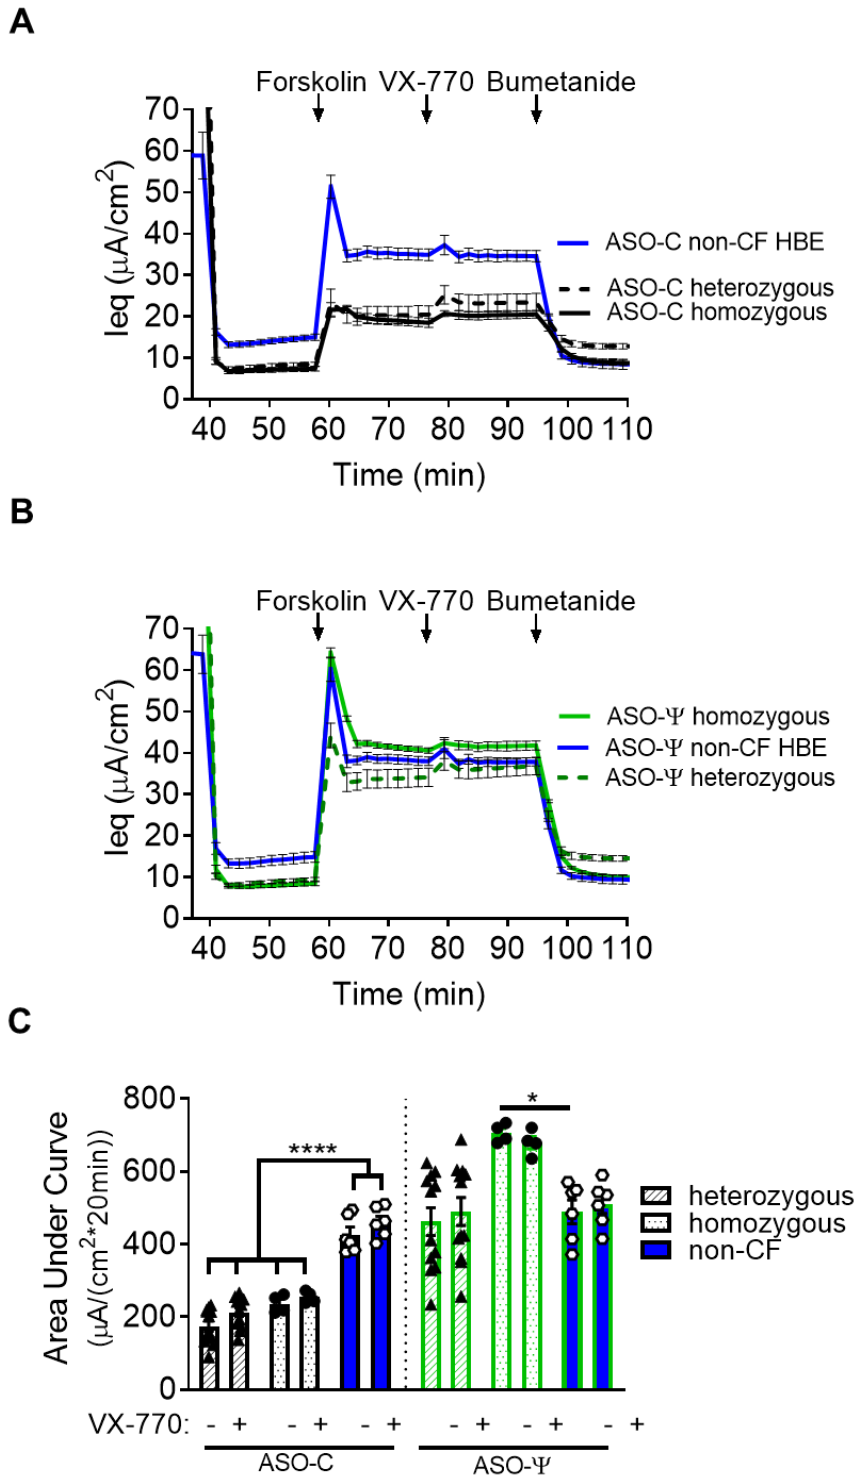

**Supplementary Figure S3.** Chloride currents in hBE cells from *CFTR* c.3718-2477T donor and non-CF donor cells. **(A)** Average  $I_{eq}$  traces from hBE cells from non-CF donors (donor 5 and donor 6) (blue line), compound heterozygous donors 1 and 2 and a

homozygous donor 3 cells treated ASO-C (black lines) and **(B)** ASO- $\psi$ . **(C)** Area under the curve of the forskolin treatment period was quantified for each genotype ( $\pm$ SEM; heterozygous N=12, homozygous N=4, non-CF N=6; One-way ANOVA, Tukey's multiple comparisons test, \* $p$ <.05, \*\*\*\* $p$ <0.0001).

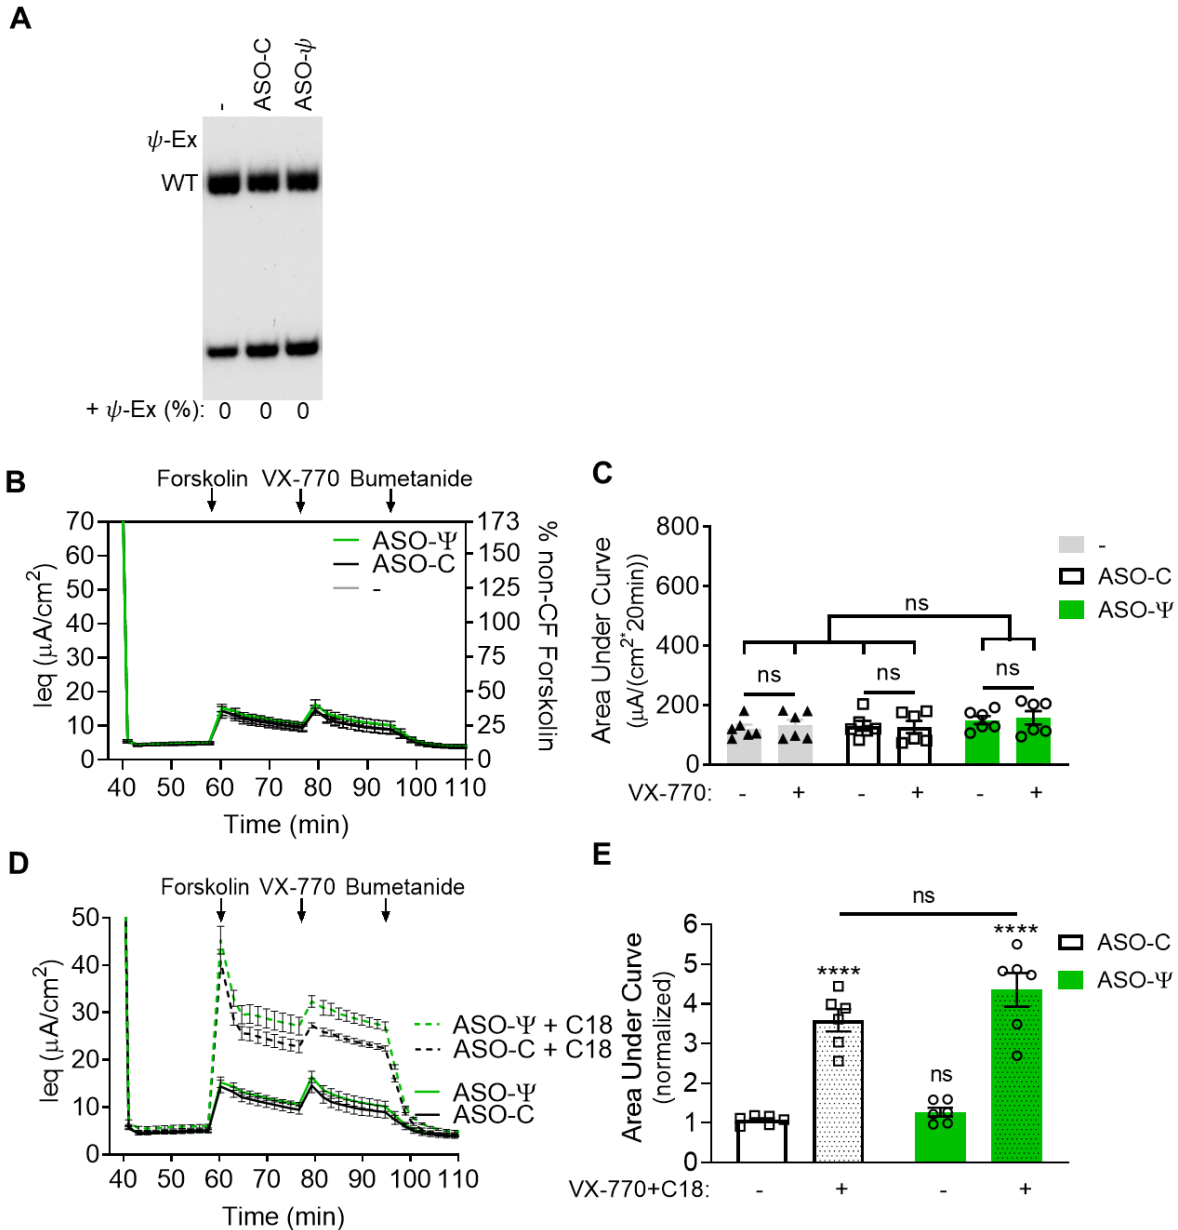

**Supplementary Figure S4.** Corrector (C18) and potentiator (VX-770), but not ASO-ψ treatment improves chloride channel activity in F508del-*CFTR* cells. **(A)** RT-PCR analysis of homozygous F508del-*CFTR* patient hBE cells (donor 4) treated with vehicle, ASO-C, or ASO-ψ. β-actin was included as a control for total RNA level. Splicing was quantified as the percent of RNA transcripts with the pseudo-exon insert [ $\frac{+\psi\text{-Ex}}{(+\psi\text{-Ex})+WT} \times 100$ ] and is shown below each lane. **(B)** Average  $I_{eq}$  traces calculated from the TECC assay (left y-axis) or normalized to percent non-CF average forskolin-specific

currents (right y-axis) (average forskolin-specific  $I_{eq}=41 \mu\text{A}/\text{cm}^2$ ; donors 5, 6) from F508del-*CFTR* homozygous hBE cells treated with vehicle (grey lines), ASO-C (black lines), or ASO- $\psi$  (green lines). **(C)** Area under the curve of the forskolin (unhashed) or forskolin + VX-770 (hashed) treatment period was quantified for samples treated with vehicle, ASO-C, or ASO- $\psi$  ( $\pm$ SEM; N=6; One-way ANOVA; Tukey's multiple comparisons test between groups; Sidak's multiple comparisons test within groups, ns= $p>0.01$ ). **(D)** Average  $I_{eq}$  traces from F508del-*CFTR* homozygous hBE cells treated with ASOs as before and with DMSO (solid lines) or C18 (6  $\mu\text{M}$ , dashed lines). **(E)** Area under the curve analysis of cells treated with (hashed) or without (unhashed) CFTR modulators (C18, VX-770) along with ASO-C (white) or ASO- $\psi$  (green) was quantified. Data was normalized to the quantification for forskolin treatment in vehicle treated samples ( $\pm$ SEM; N=6; One-way ANOVA, Tukey's multiple comparisons test, \*\*\*\* $p<0.0001$ , ns= $p>0.01$ ).

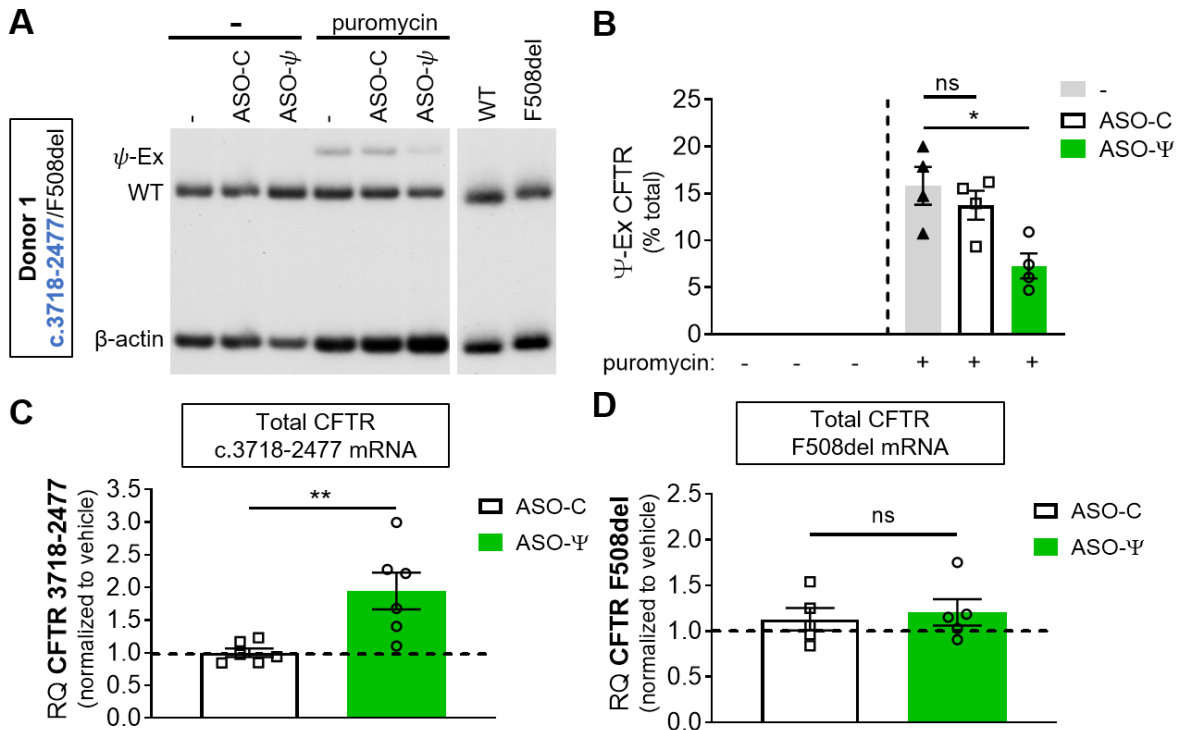

**Supplementary Figure S5.** ASO- $\psi$  treatment increases full-length *CFTR* mRNA in compound heterozygous patient cells. **(A)** RT-PCR analysis of compound heterozygous hBE cells (c.3718-2477 T/F508del) treated as in Fig 3A. **(B)**  $\psi$ -Ex splicing quantified as the percent of total *CFTR*. ( $\pm$ SEM; N=4; One-way ANOVA with Tukey's multiple comparisons test, \* $p$ <0.05) **(C)** RT-qPCR analyses of total *CFTR* mRNA from the *CFTR* c.3718-2477C>T allele. ( $\pm$ SEM; N=6; t-test, \*\* $p$ <0.01) **(D)** F508del-*CFTR* isolated from the compound heterozygous patient (donor 1) treated as above ( $\pm$ SEM; N=5; t-test, ns= $p$ >0.05). Relative quantity (RQ) was normalized to vehicle treatment.

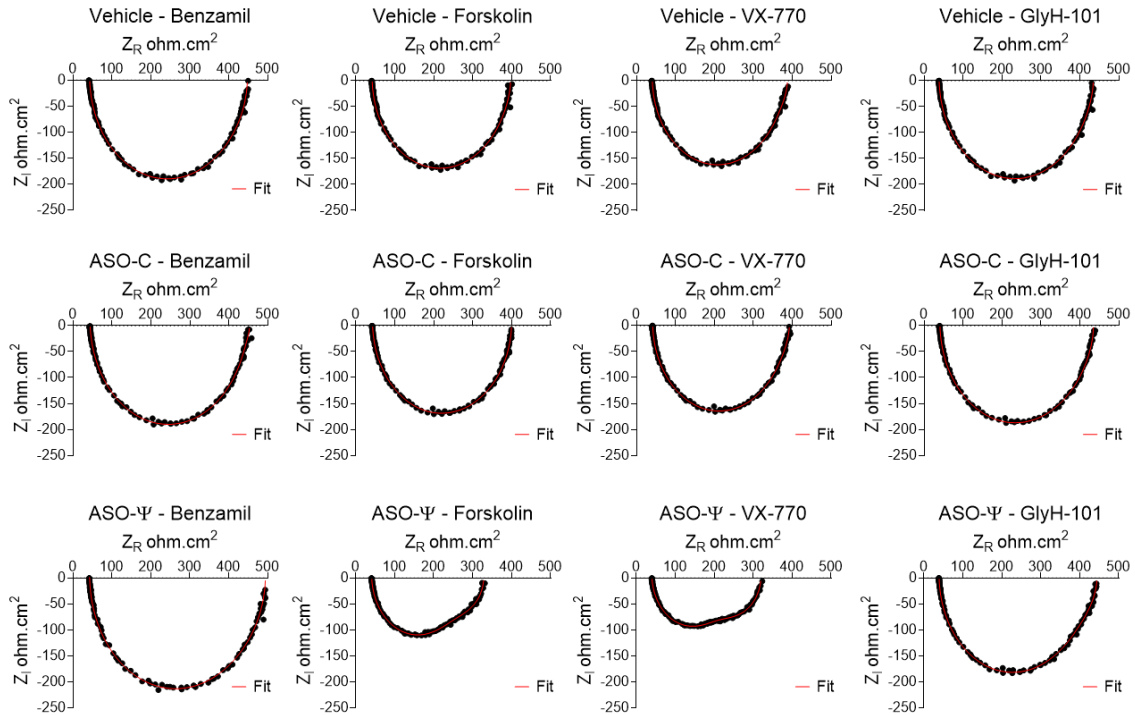

**Supplementary Figure S6.** Impedance spectra data presented as representative Nyquist plots from a single replicate after benzamil, forskolin, VX-770, and GlyH-101 treatments, in vehicle, ASO-C, or ASO- $\psi$  treated homozygous *CFTR* c.3718-2477C>T hBE cells. Both the real ( $Z_R$ ) and imaginary ( $Z_i$ ) components of the measured impedance are plotted together from all 126 frequencies (black dots). Model fitting for each impedance spectrum is plotted as a red line (Fit).



| ASOs         | Sequence (5'-3')                               |
|--------------|------------------------------------------------|
| ASO-Ψ        | CCTTTCAGGGTGTCTTACTCACCAT                      |
| ASO-C        | CCTCTTACCTCAGTTACAATTTATA                      |
| Primers      | Sequence (5'-3')                               |
| hCFTRex22F   | CCAAACCATAACAAGAAT                             |
| hCFTRex24R   | GATCACTCCACTGTTTCAT                            |
| hGAPDHFor    | GAAGGTGAAGGTCGGAGTC                            |
| hGAPDHRev    | GAAGATGGTGATGGGATTTTC                          |
| hβ-actinFor  | AAAGACCTGTACGCCAACAC                           |
| hβ-actinRev  | GTCATACTCCTGCTTGCTGAT                          |
| hSC351.7kbF  | GGCGTGTATTGGAGCAGATGTA                         |
| hSC351.7kbR  | CTGCTACACAACCTGCGCCTTTT                        |
| hCFTR-3849F  | CTTGTCATCTTGATTTCTGGAGAC                       |
| hCFTR-3849R  | GGATCAGGGAAGAGTACTTTGT                         |
| hCFTR-F508F  | TGGCACCATTAAAGAAAATATCATCTT                    |
| hCFTR-F508R  | CTCAGTGTGATTCCACCTTCTC                         |
| hCFTR-DF508F | GGCACCATTAAAGAAAATATCATTGG                     |
| hCFTR-DF508R | CTCAGTGTGATTCCACCTTCT                          |
| Probes       | Sequence (5'-3')                               |
| hCFTR-3849   | /56-FAM/AAATGGTGG/ZEN/GCCTCTTGGGAAGAA/3IABkFQ/ |
| hCFTR-F508   | /56-FAM/ACAGAAGCG/ZEN/TCATCAAAGCATGCC/3IABkFQ/ |
| hCFTR-DF508  | /56-FAM/ACAGAAGCG/ZEN/TCATCAAAGCATGCC/3IABkFQ/ |

**Supplementary Table S1** – Splice-switching Antisense Oligonucleotides, Primers, and Probes.

|                                                        | Treatment: | Donor 1 N=9<br>c.3718-2477/F508del | Donor 2 N=3<br>c.3718-2477/F508del | Donor 3 N=4<br>c.3718-2477 | Donor 4 N=6<br>F508del | Donor 5&6 N=6<br>WT |
|--------------------------------------------------------|------------|------------------------------------|------------------------------------|----------------------------|------------------------|---------------------|
| Baseline<br>Rt<br>(ohms.cm <sup>2</sup> )              | (-)        | 236.9 ± 19.28                      | 205.6 ± 3.47                       | 271.4 ± 9.09               | 300.9 ± 37.24          | 197.79 ± 20.17      |
|                                                        | ASO-C      | 235.1 ± 19.08                      | 205.2 ± 7.60                       | 272.8 ± 8.02               | 299.8 ± 38.57          | 197.54 ± 11.99      |
|                                                        | ASO-Ψ      | 215.9 ± 16.17                      | 167.9 ± 11.60                      | 240.0 ± 7.64*              | 287.1 ± 28.91          | 224.21 ± 15.76      |
|                                                        | (-) C18    | 241.8 ± 18.19                      | 226.2 ± 4.86                       | 280.1 ± 9.86               | 303.0 ± 41.83          | 231.25 ± 39.66      |
|                                                        | ASO-C C18  | 238.9 ± 19.98                      | 214.8 ± 7.73                       | 278.5 ± 5.10               | 303.2 ± 38.87          | 204.79 ± 23.90      |
|                                                        | ASO-Ψ C18  | 219.6 ± 17.51                      | 172.8 ± 8.27*                      | 247.2 ± 2.43*              | 292.9 ± 28.69          | 231.50 ± 23.26      |
| Baseline<br>I <sub>eq</sub><br>(μA/cm <sup>2</sup> )   | (-)        | 141.2 ± 13.75                      | 154.6 ± 3.46                       | 109.2 ± 7.47               | 172.1 ± 16.73          | 58.74 ± 6.44        |
|                                                        | ASO-C      | 149.6 ± 15.51                      | 156.0 ± 2.64                       | 110.8 ± 6.69               | 168.9 ± 16.90          | 58.89 ± 5.63        |
|                                                        | ASO-Ψ      | 143.3 ± 12.09                      | 160.0 ± 6.64                       | 114.3 ± 7.20               | 161.7 ± 15.53          | 63.87 ± 4.65        |
|                                                        | (-) C18    | 143.9 ± 14.00                      | 153.9 ± 3.38                       | 112.3 ± 8.69               | 177.0 ± 14.91          | 57.77 ± 6.78        |
|                                                        | ASO-C C18  | 149.7 ± 16.26                      | 167.7 ± 3.37                       | 111.3 ± 5.98               | 173.5 ± 14.33          | 61.31 ± 3.91        |
|                                                        | ASO-Ψ C18  | 152.3 ± 15.78                      | 170.6 ± 2.62                       | 110.0 ± 6.34               | 163.0 ± 14.21          | 59.47 ± 5.68        |
| Benzamil<br>I <sub>eq</sub><br>(μA/cm <sup>2</sup> )   | (-)        | 8.8 ± 0.44                         | 7.1 ± 0.13                         | 7.3 ± 0.17                 | 4.7 ± 0.83             | 15.34 ± 0.85        |
|                                                        | ASO-C      | 9.3 ± 0.55                         | 6.1 ± 0.15                         | 7.4 ± 0.60                 | 4.9 ± 0.37             | 14.97 ± 0.76        |
|                                                        | ASO-Ψ      | 10.0 ± 0.46                        | 8.1 ± 0.19                         | 8.4 ± 0.49                 | 5.0 ± 0.32             | 14.87 ± 1.28        |
|                                                        | (-) C18    | 8.8 ± 0.62                         | 7.3 ± 0.31                         | 7.5 ± 0.46                 | 5.1 ± 0.33             | 16.73 ± 0.57        |
|                                                        | ASO-C C18  | 9.5 ± 0.54                         | 8.0 ± 0.22                         | 6.9 ± 0.38                 | 5.1 ± 0.33             | 16.64 ± 1.03        |
|                                                        | ASO-Ψ C18  | 10.3 ± 0.67                        | 10.8 ± 0.94*                       | 8.8 ± 0.71                 | 6.0 ± 0.39             | 18.30 ± 0.86        |
| Forskolin<br>I <sub>eq</sub><br>(μA/cm <sup>2</sup> )  | (-)        | 17.5 ± 1.08                        | 18.6 ± 0.39                        | 18.5 ± 0.41                | 9.1 ± 0.83             | 34.72 ± 0.82        |
|                                                        | ASO-C      | 21.2 ± 2.87                        | 18.3 ± 0.46                        | 18.5 ± 1.12                | 9.5 ± 0.91             | 34.92 ± 1.40        |
|                                                        | ASO-Ψ      | 32.2 ± 2.70*                       | 39.7 ± 0.21****                    | 40.6 ± 0.67****            | 10.6 ± 0.38            | 38.03 ± 1.07        |
|                                                        | (-) C18    | 22.6 ± 1.77                        | 27.6 ± 0.61                        | 20.9 ± 0.79                | 22.2 ± 0.85            | 34.13 ± 1.14        |
|                                                        | ASO-C C18  | 25.2 ± 2.58                        | 29.1 ± 0.93****                    | 20.3 ± 0.71                | 22.8 ± 1.30****        | 34.98 ± 1.47        |
|                                                        | ASO-Ψ C18  | 32.7 ± 2.49                        | 48.4 ± 0.31****                    | 44.5 ± 0.65****            | 27.2 ± 1.88****        | 37.79 ± 1.56        |
| VX-770<br>I <sub>eq</sub><br>(μA/cm <sup>2</sup> )     | (-)        | 20.5 ± 1.14                        | 22.6 ± 0.46                        | 20.7 ± 0.16                | 8.8 ± 1.26             | 34.57 ± 0.83        |
|                                                        | ASO-C      | 24.1 ± 2.86                        | 21.4 ± 0.45                        | 20.5 ± 0.94                | 9.0 ± 1.25             | 34.58 ± 1.33        |
|                                                        | ASO-Ψ      | 35.1 ± 2.55*                       | 42.2 ± 0.77****                    | 41.8 ± 1.14****            | 10.2 ± 1.11            | 37.81 ± 0.99        |
|                                                        | (-) C18    | 26.6 ± 1.68                        | 33.0 ± 0.55                        | 21.6 ± 0.52                | 22.2 ± 0.43            | 33.94 ± 1.12        |
|                                                        | ASO-C C18  | 28.7 ± 2.36                        | 32.3 ± 0.67****                    | 20.9 ± 0.44                | 22.4 ± 0.58****        | 34.76 ± 1.24        |
|                                                        | ASO-Ψ C18  | 35.5 ± 2.56                        | 50.5 ± 0.86****                    | 43.7 ± 0.89****            | 27.1 ± 0.90****        | 37.49 ± 1.37        |
| Bumetanide<br>I <sub>eq</sub><br>(μA/cm <sup>2</sup> ) | (-)        | 13.2 ± 0.64                        | 11.5 ± 0.12                        | 8.8 ± 0.09                 | 3.9 ± 0.52             | 9.33 ± 1.49         |
|                                                        | ASO-C      | 13.8 ± 0.72                        | 11.3 ± 0.20                        | 8.8 ± 0.67                 | 4.2 ± 0.52             | 8.58 ± 1.27         |
|                                                        | ASO-Ψ      | 15.5 ± 0.71                        | 12.4 ± 0.39                        | 9.9 ± 0.42                 | 4.1 ± 0.29             | 9.64 ± 1.15         |
|                                                        | (-) C18    | 13.1 ± 0.76                        | 11.6 ± 0.19                        | 8.2 ± 0.42                 | 3.9 ± 0.53             | 8.06 ± 0.94         |
|                                                        | ASO-C C18  | 13.8 ± 0.65                        | 11.4 ± 0.22                        | 7.7 ± 0.31                 | 3.6 ± 0.39             | 8.65 ± 1.22         |
|                                                        | ASO-Ψ C18  | 15.0 ± 0.69                        | 13.3 ± 0.32                        | 9.2 ± 0.52                 | 4.5 ± 0.29             | 9.18 ± 0.79         |

\*=ASO-C vs ASO-Ψ \*p<.05, \*\*p<.01, \*\*\*p<.001, \*\*\*\*p<.0001  
+=ASO alone vs ASO + C18 +p<.05, ++p<.01, +++p<.001, ++++p<.0001

**Supplementary Table S2.** I<sub>eq</sub> and Rt values from donor HBE cell in Figures 2 and 6 and Supplementary Figures S2 and S3.

|                                                        | Treatment: | Donor 3 N=3<br>4 days treated | Donor 3 N=3<br>8 days treated | Donor 3 N=3<br>16 days treated |
|--------------------------------------------------------|------------|-------------------------------|-------------------------------|--------------------------------|
| Baseline<br>Rt<br>(ohms.cm <sup>2</sup> )              | (-)        | 205.5 ± 21.39                 | 206.7 ± 21.18                 | 285.8 ± 9.42                   |
|                                                        | ASO-C      | 183.0 ± 28.29                 | 181.0 ± 21.76                 | 299.7 ± 7.34                   |
|                                                        | ASO-Ψ      | 182.2 ± 26.52                 | 183.7 ± 25.42                 | 253.2 ± 11.46                  |
| Baseline<br>I <sub>eq</sub><br>(μA/cm <sup>2</sup> )   | (-)        | 119.5 ± 3.00                  | 103.4 ± 6.79                  | 100.3 ± 4.15                   |
|                                                        | ASO-C      | 114.9 ± 1.62                  | 103.1 ± 5.90                  | 95.0 ± 5.12                    |
|                                                        | ASO-Ψ      | 120.4 ± 4.09                  | 95.3 ± 5.88                   | 99.4 ± 4.44                    |
| Benzamil<br>I <sub>eq</sub><br>(μA/cm <sup>2</sup> )   | (-)        | 6.5 ± 1.04                    | 5.4 ± 0.52                    | 5.0 ± 0.80                     |
|                                                        | ASO-C      | 7.3 ± 1.15                    | 5.7 ± 1.01                    | 5.6 ± 0.35                     |
|                                                        | ASO-Ψ      | 10.9 ± 2.05                   | 22.2 ± 8.96                   | 16.48 ± 3.71 <sup>*</sup>      |
| Forskolin<br>I <sub>eq</sub><br>(μA/cm <sup>2</sup> )  | (-)        | 23.7 ± 1.98                   | 18.5 ± 1.45                   | 14.7 ± 1.29                    |
|                                                        | ASO-C      | 26.0 ± 1.56                   | 19.2 ± 1.05                   | 15.3 ± 0.47                    |
|                                                        | ASO-Ψ      | 38.8 ± 2.62 <sup>*</sup>      | 43.2 ± 2.29 <sup>***</sup>    | 37.1 ± 2.56 <sup>***</sup>     |
| VX-770<br>I <sub>eq</sub><br>(μA/cm <sup>2</sup> )     | (-)        | 24.5 ± 1.90                   | 18.9 ± 1.31                   | 14.4 ± 0.87                    |
|                                                        | ASO-C      | 27.3 ± 1.23                   | 19.8 ± 1.00                   | 15.2 ± 0.18                    |
|                                                        | ASO-Ψ      | 39.3 ± 2.41 <sup>*</sup>      | 39.0 ± 3.38 <sup>**</sup>     | 37.3 ± 2.68 <sup>***</sup>     |
| Bumetanide<br>I <sub>eq</sub><br>(μA/cm <sup>2</sup> ) | (-)        | 7.9 ± 1.47                    | 5.8 ± 0.27                    | 5.1 ± 0.74                     |
|                                                        | ASO-C      | 9.5 ± 1.29                    | 5.8 ± 0.72                    | 5.2 ± 0.14                     |
|                                                        | ASO-Ψ      | 8.6 ± 1.58                    | 6.2 ± 1.80                    | 6.4 ± 0.55                     |

\*=ASO-C vs ASO-Ψ \*p<.05, \*\*p<.01, \*\*\*p<.001, \*\*\*\*p<.0001

**Supplementary Table S3.** I<sub>eq</sub> and Rt values from donor 3 in Figure 4.
